# Supplementary material
Source: PubMed Central journal article supplement (PMC1805588)

ZH-attP-35B

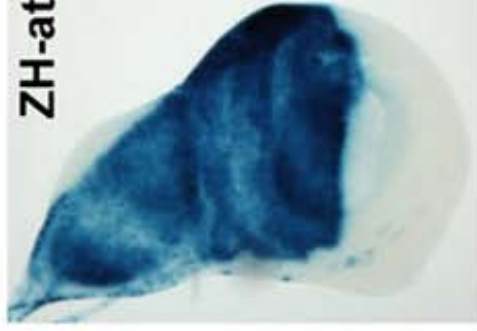

ZH-attP-68E

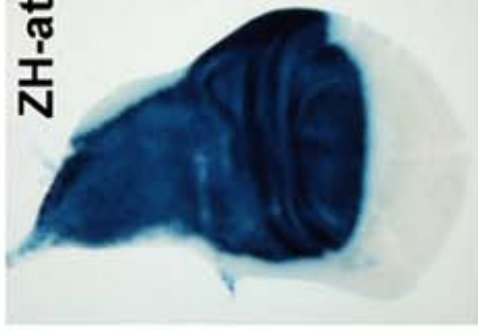

ZH-attP-102D

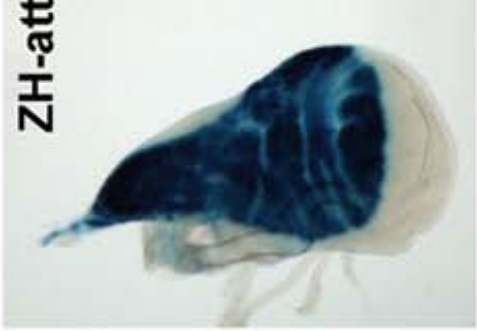

ZH-attP-22A

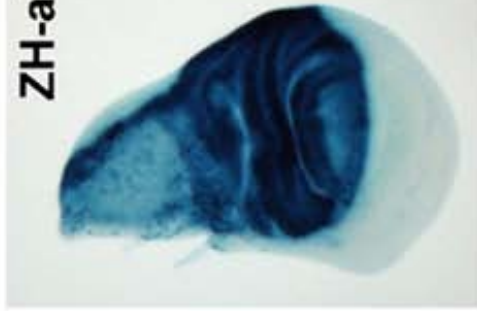

ZH-attP-64A

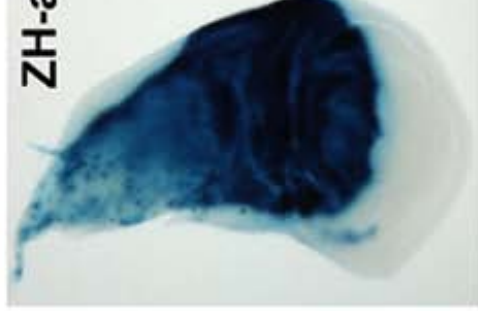

ZH-attP-86Fb

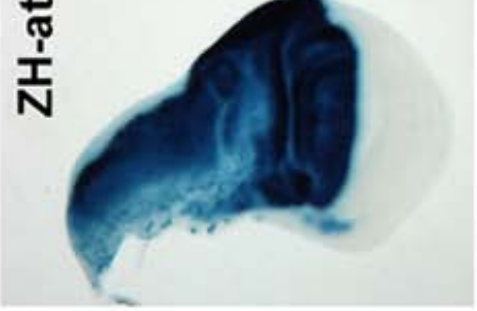

ZH-attP-2A

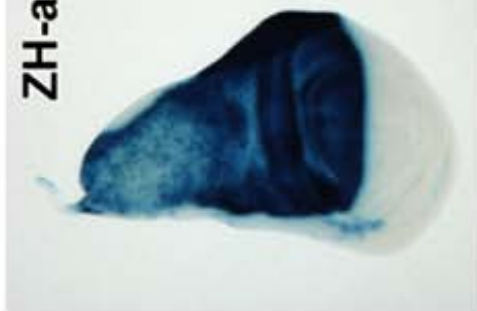

ZH-attP-36B

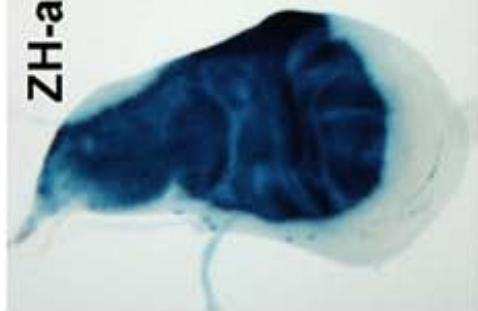

ZH-attP-75C

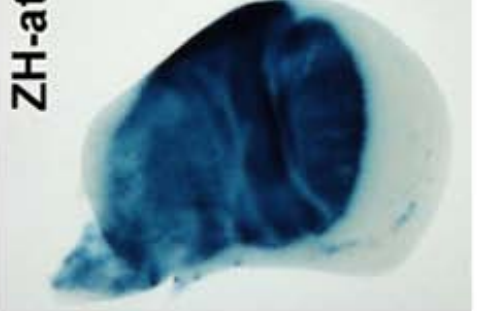

Supplement: pnas_0611511104_1.pdf [file pnas_0611511104_1.pdf]
